# Supplementary material for: Cost effectiveness of pharmacogenetic-guided clozapine administration based on risk of HLA variants in Japan and the UK
Source: PubMed Central journal article supplement (PMC8260588; doi:10.1038/s41398-021-01487-4), 2021-07-07
Supplement: 41398_2021_1487_MOESM1_ESM.pdf [file 41398_2021_1487_MOESM1_ESM.pdf]

|                                |               | HLA-guided treatment schedule |                              | general treatment schedule<br>without HLA test |
|--------------------------------|---------------|-------------------------------|------------------------------|------------------------------------------------|
| CIAG transition<br>probability | For Japan     | HLA-B*59:01 (+)               | HLA-B*59:01 (-)              | All patients                                   |
|                                | 1-4 months    | 0.0399                        | 0.00657                      | 0.00835                                        |
|                                | 5-12 months   | 0.0117                        | 0.00167                      | 0.00213                                        |
|                                | 13-120 months | 0.000448                      | 4.16E-05                     | 5.32E-05                                       |
|                                | For the UK    | HLA-B 158T/HLA-DQB1 126Q (+)  | HLA-B 158T/HLA-DQB1 126Q (-) | All patients                                   |
|                                | 1-4 months    | 0.0241                        | 0.00592                      | 0.00783                                        |
|                                | 6-120 months  | 0.000103                      | 2.39E-05                     | 3.181E-05                                      |

**Supplementary Table1:** CIAG transition probability associated with health states 1 and 2

CIAG: Clozapine-induced agranulocytosis/granulocytopenia

CIAG transition probability for the Japanese population was estimated based on the trend of the susceptible timing of CIAG (start to 4 months: 60%, 6–12 months: 30%, at 13 months: 10%, Inada et al., 2018)

CIAG transition probability for the UK population was estimated based on the trend of the susceptible timing of CIAG (start to 6 months: 90%, 6 months: 10%)

| Parameter                             | JPN/UK | Mean   | Lowest value for sensitivity analysis | Highest value for sensitivity analysis | Probabilistic sensitivity analysis | Type of distribution | Distribution Parameter | References      |
|---------------------------------------|--------|--------|---------------------------------------|----------------------------------------|------------------------------------|----------------------|------------------------|-----------------|
| CIAG prevalence                       | JPN    | 5.44%  |                                       |                                        | NO                                 |                      |                        | 12              |
|                                       | UK     | 3.43%  |                                       |                                        | NO                                 |                      |                        | 11              |
| allele frequency of risk HLA variants | JPN    | 2%     |                                       |                                        | NO                                 |                      |                        | HLA Laboratory* |
|                                       | UK     | 5.46%  |                                       |                                        | NO                                 |                      |                        | 6               |
| phenotype frequency                   | JPN    | 3.96%  |                                       |                                        | NO                                 |                      |                        |                 |
|                                       | UK     | 10.60% |                                       |                                        | NO                                 |                      |                        |                 |
| PPV of HLA test                       | JPN    | 32.30% | 21%                                   | 46.3%                                  | YES                                | Beta                 | alpha:117.2 beta:236.4 | 5               |
|                                       | UK     | 10.60% | 9%                                    | 13.1%                                  | YES                                | Beta                 | alpha:98.6 beta:840.2  | 6               |

**Supplementary Table2:** Input parameters

CIAG: Clozapine-induced agranulocytosis/granulocytopenia, JPN: Japan, UK: United Kingdom, PPV: positive predictive value

CIAG onset period are listed in Supplementary Table1.

\*: [http://hla.or.jp/med/frequency\\_search/en/haplo/](http://hla.or.jp/med/frequency_search/en/haplo/)

| Parameter                                            | JPN/UK | Mean   | Lowest value for sensitivity analysis | Highest value for sensitivity analysis | Probabilistic sensitivity analysis | Type of distribution | Distribution Parameter   | References |
|------------------------------------------------------|--------|--------|---------------------------------------|----------------------------------------|------------------------------------|----------------------|--------------------------|------------|
| Cost of CIAG £                                       | JPN    | 985.8  | 0                                     | 1766                                   | YES                                | Gamma                | alpha:1.48 lambda:1.5E-3 | 12         |
|                                                      | UK     | 469.48 | 0                                     | 939                                    | YES                                | Gamma                | alpha:4 lambda:8.5E-3    | 15         |
| Cost of CLZ/day £                                    | JPN    | 4.42   | 1                                     | 7.91                                   | YES                                | Gamma                | alpha:6.05 lambda:1.37   | 12         |
|                                                      | UK     | 1.23   | 0.41                                  | 1.64                                   | YES                                | Gamma                | alpha:37.8 lambda:30.75  | 14,16      |
| Cost of substitute/day £                             | JPN    | 7.52   | 5.7                                   | 11.83                                  | YES                                | Gamma                | alpha:9.92 lambda:1.32   | 17         |
|                                                      | UK     | 5.11   | 2.42                                  | 10.22                                  | YES                                | Gamma                | alpha:104.4 lambda:20.44 | 14,16      |
| Cost of HLA test £                                   | JPN    | 86.6   |                                       |                                        | NO                                 |                      |                          |            |
|                                                      | UK     | 100    |                                       |                                        | NO                                 |                      |                          |            |
| Cost of regular blood test*/month £                  | JPN    | 30.27  |                                       |                                        | NO                                 |                      |                          |            |
|                                                      | UK     | 10.6   |                                       |                                        | NO                                 |                      |                          |            |
| Utility for patients undergoing clozapine treatment  | JPN/UK | 0.693  |                                       |                                        | YES                                | Beta                 | alpha:575 beta:255       | 7          |
| Utility for patients undergoing substitute treatment | JPN/UK | 0.560  |                                       |                                        | YES                                | Beta                 | alpha:86 beta:67         | 7          |
| CIAG prevention rate                                 | JPN/UK | 30%    | 20%                                   | 80%                                    | YES                                | Beta                 | alpha:24.9 beta:58.1     |            |

**Supplementary Table3:** Cost estimates, utilities, and other parameter used in the sensitivity analysis

CIAG: Clozapine-induced agranulocytosis/granulocytopenia, CLZ: clozapine, JPN: Japan, UK: United Kingdom, G-CSF: granulocyte colony stimulating factor

\*Cost for the regular blood examination for patients who would be given clozapine treatment. If patients developed CIAG, this fee would not be counted.

|                                  |                                      | <b>general treatment schedule<br/>without HLA test</b> | <b>HLA-guided treatment schedule</b> |
|----------------------------------|--------------------------------------|--------------------------------------------------------|--------------------------------------|
| CLZ prevention rate (0.2-0.8)    | Cost per patient/10 years £          | 16,486                                                 | 16,558-16,517                        |
|                                  | Incremental Cost £                   |                                                        | 72-31                                |
|                                  | Effect per patient /10 years (QALYs) | 6.22608                                                | 6.22813-6.23434                      |
|                                  | Incremental Effect (QALYs)           |                                                        | 0.00206-0.00826                      |
|                                  | ICER £/ (QALY)                       |                                                        | 34,920-3,729                         |
| PPV of Genetic test (0.21-0.463) | Cost per patient/10 years £          | 16,486                                                 | 16,560-16,543                        |
|                                  | Incremental Cost £                   |                                                        | 73-56                                |
|                                  | Effect per patient /10 years (QALYs) | 6.22608                                                | 6.22803-6.23040                      |
|                                  | Incremental Effect (QALYs)           |                                                        | 0.00196-0.00432                      |
|                                  | ICER £/ (QALY)                       |                                                        | 37,261-13,052                        |
| Cost of CLZ/day £ (1-7.91)       | Cost per patient/10 years £          | 6,578-26,597                                           | 6,617-26,689                         |
|                                  | Incremental Cost £                   |                                                        | 37-93                                |
|                                  | Effect per patient /10 years (QALYs) | 6.22608                                                | 6.22917                              |

|                                      |                                      |                 |                 |
|--------------------------------------|--------------------------------------|-----------------|-----------------|
|                                      | Incremental Effect (QALYs)           |                 | 0.00309         |
|                                      | ICER £/ (QALY)                       |                 | 12,230-29,997   |
| Cost of substitute/day £ (5.7-11.83) | Cost per patient/10 years £          | 16,212-17,139   | 16,291-17,170   |
|                                      | Incremental Cost £                   |                 | 79-31           |
|                                      | Effect per patient /10 years (QALYs) | 6.22608         | 6.23020         |
|                                      | Incremental Effect (QALYs)           |                 | 0.00309         |
|                                      | ICER £/ (QALY)                       |                 | 25,695-9934     |
| Cost of CIAG £ (0-1766)              | Cost per patient/10 years £          | 16,434-16,529   | 16,503-16,591   |
|                                      | Incremental Cost £                   |                 | 69-61           |
|                                      | Effect per patient /10 years (QALYs) | 6.22608         | 6.23123         |
|                                      | Incremental Effect (QALYs)           |                 | 0.00309         |
|                                      | ICER £/ (QALY)                       |                 | 22,249-20,054   |
| Discount rate (0-0.05)               | Cost per patient/10 years £          | 18,163-14,393   | 18,226-14,460   |
|                                      | Incremental Cost £                   |                 | 63-68           |
|                                      | Effect per patient /10 years (QALYs) | 6.86254-5.43114 | 6.86710-5.43473 |
|                                      | Incremental Effect (QALYs)           |                 | 0.00341-0.00269 |
|                                      | ICER £/QALYs                         |                 | 18,440-25,125   |

**Supplementary Table4:** One-way sensitivity analysis for the Japanese population

CLZ: clozapine, ICER: incremental cost-effectiveness ratio, QALY: quality-adjusted life year

|                                       |                                      | <b>general treatment schedule<br/>without HLA test</b> | <b>HLA-guided treatment schedule</b> |
|---------------------------------------|--------------------------------------|--------------------------------------------------------|--------------------------------------|
| CLZ prevention rate (0.2-0.8)         | Cost per patient/10 years £          | 4,211                                                  | 4,291-4,230                          |
|                                       | Incremental Cost £                   |                                                        | 80-19                                |
|                                       | Effect per patient /10 years (QALYs) | 5.82665                                                | 5.82882 -5.83533                     |
|                                       | Incremental Effect (QALYs)           |                                                        | 0.00217 -0.00869                     |
|                                       | ICER £/ (QALY)                       |                                                        | 36,715-2,145                         |
| PPV of Genetic test (0.09-0.131)      | Cost per patient/10 years £          | 4,211                                                  | 4,285-4,273                          |
|                                       | Incremental Cost £                   |                                                        | 72-59                                |
|                                       | Effect per patient /10 years (QALYs) | 5.82665                                                | 5.82944 -5.83071                     |
|                                       | Incremental Effect (QALYs)           |                                                        | 0.00279 -0.00406                     |
|                                       | ICER £/ (QALY)                       |                                                        | 26,456 -15,256                       |
| Cost of CLZ/day £ (0.41-1.64)         | Cost per patient/10 years £          | 1,954-5,340                                            | 2,016-5,413                          |
|                                       | Incremental Cost £                   |                                                        | 63 -73                               |
|                                       | Effect per patient /10 years (QALYs) | 5.82665                                                | 5.8299                               |
|                                       | Incremental Effect (QALYs)           |                                                        | 0.00326                              |
|                                       | ICER £/ (QALY)                       |                                                        | 19,235-22,397                        |
| Cost of substitute/day £ (2.42-10.22) | Cost per patient/10 years £          | 3,968-4,672                                            | 4,060-4,699                          |
|                                       | Incremental Cost £                   |                                                        | 92-27                                |

|                        |                                      |                  |                  |
|------------------------|--------------------------------------|------------------|------------------|
|                        | Effect per patient /10 years (QALYs) | 5.82665          | 5.8299           |
|                        | Incremental Effect (QALYs)           |                  | 0.00326          |
|                        | ICER £/ (QALY)                       |                  | 28,260-8,205     |
| Cost of CIAG £ (0-939) | Cost per patient/10 years £          | 4,195-4,227      | 4,266-4,295      |
|                        | Incremental Cost £                   |                  | 71-68            |
|                        | Effect per patient /10 years (QALYs) | 5.82665          | 5.8299           |
|                        | Incremental Effect (QALYs)           |                  | 0.00326          |
|                        | ICER £/ (QALY)                       |                  | 21,774-20,912    |
| Discount rate (0-0.05) | Cost per patient/10 years £          | 4,962-3,943      | 5,026-4,015      |
|                        | Incremental Cost £                   |                  | 64-71            |
|                        | Effect per patient /10 years (QALYs) | 6.88596 -5.44930 | 6.88982 -5.45234 |
|                        | Incremental Effect (QALYs)           |                  | 0.00386 -0.00304 |
|                        | ICER £/QALYs                         |                  | 16,594-23,491    |

**Supplementary Table5:** One-way sensitivity analysis for the UK population

CLZ: clozapine, ICER: incremental cost-effectiveness ratio, QALY: quality-adjusted life year

|                     | JPN/UK | HLA-guided treatment schedule<br>(95%CI) | general treatment schedule without HLA test<br>(95%CI) |
|---------------------|--------|------------------------------------------|--------------------------------------------------------|
| Cost per patient £  | JPN    | 16,551 (8,366-28,559)                    | 16,487 (8,321-28,437)                                  |
|                     | UK     | 4,279 (3,276-5,451)                      | 4,210 (3,209-5,378)                                    |
| QALYs for ten years | JPN    | 6.22966 (5.95397-6.49825)                | 6.22657 (5.95143-6.49488)                              |
|                     | UK     | 5.82992 (5.56793-6.08483)                | 5.82667 (5.56492-6.08109)                              |

**Supplementary Table6:** Result of probabilistic sensitivity analysis based on 100,000 simulations

QALY: quality-adjusted life year, CI: confidence interval, JPN: Japan, UK: United Kingdom, ICER: incremental cost-effectiveness ratio

|                                     | <b>general treatment<br/>schedule without<br/>HLA test</b> | <b>HLA-guided treatment<br/>schedule</b> |                                      | <b>general treatment<br/>schedule without<br/>HLA test</b> | <b>HLA-guided treatment<br/>schedule</b> |
|-------------------------------------|------------------------------------------------------------|------------------------------------------|--------------------------------------|------------------------------------------------------------|------------------------------------------|
| Cost per patient/3 years            | 5,364                                                      | 5,443                                    | Cost per patient/12 years £          | 19,395                                                     | 19,456                                   |
| Incremental Cost £                  |                                                            | 78                                       | Incremental Cost £                   |                                                            | 61                                       |
| Effect per patient /3 years (QALYs) | 2.00203                                                    | 2.00108                                  | Effect per patient /12 years (QALYs) | 7.33256                                                    | 7.32891                                  |
| Incremental Effect (QALYs)          |                                                            | 0.00094                                  | Incremental Effect (QALYs)           |                                                            | 0.00365                                  |
| ICER £/ (QALY)                      |                                                            | 83,089                                   | ICER £/ (QALY)                       |                                                            | 16,828                                   |
| Cost per patient/4 years £          | 7,048                                                      | 7,124                                    | Cost per patient/13 years £          | 20,807                                                     | 20,867                                   |
| Incremental Cost £                  |                                                            | 76                                       | Incremental Cost £                   |                                                            | 60                                       |
| Effect per patient /4 years (QALYs) | 2.64258                                                    | 2.64131                                  | Effect per patient /13 years (QALYs) | 7.86799                                                    | 7.86407                                  |
| Incremental Effect (QALYs)          |                                                            | 0.00127                                  | Incremental Effect (QALYs)           |                                                            | 0.00393                                  |
| ICER £/ (QALY)                      |                                                            | 60,181                                   | ICER £/ (QALY)                       |                                                            | 15,222                                   |
| Cost per patient/5 years £          | 8,699                                                      | 8,773                                    | Cost per patient/14 years £          | 22,191                                                     | 22,249                                   |
| Incremental Cost £                  |                                                            | 74                                       | Incremental Cost £                   |                                                            | 58                                       |
| Effect per patient /5 years (QALYs) | 3.27050                                                    | 3.26891                                  | Effect per patient /14 years (QALYs) | 8.39287                                                    | 8.38867                                  |
| Incremental Effect (QALYs)          |                                                            | 0.00159                                  | Incremental Effect (QALYs)           |                                                            | 0.00420                                  |
| ICER £/ (QALY)                      |                                                            | 46,841                                   | ICER £/ (QALY)                       |                                                            | 13,848                                   |
| Cost per patient/6 years £          | 10,318                                                     | 10,390                                   | Cost per patient/15 years £          | 23,549                                                     | 23,606                                   |
| Incremental Cost £                  |                                                            | 72                                       | Incremental Cost £                   |                                                            | 56                                       |

|                                     |         |         |                                      |          |          |
|-------------------------------------|---------|---------|--------------------------------------|----------|----------|
| Effect per patient /6 years (QALYs) | 3.88604 | 3.88414 | Effect per patient /15 years (QALYs) | 8.90739  | 8.90293  |
| Incremental Effect (QALYs)          |         | 0.00190 | Incremental Effect (QALYs)           |          | 0.00446  |
| ICER £/ (QALY)                      |         | 38,111  | ICER £/ (QALY)                       |          | 12,660   |
| Cost per patient/7 years £          | 11,906  | 11,976  | Cost per patient/16 years £          | 24,881   | 24,936   |
| Incremental Cost £                  |         | 71      | Incremental Cost £                   |          | 55       |
| Effect per patient /7 years (QALYs) | 4.48943 | 4.48723 | Effect per patient /16 years (QALYs) | 9.41177  | 9.40705  |
| Incremental Effect (QALYs)          |         | 0.00221 | Incremental Effect (QALYs)           |          | 0.00472  |
| ICER £/ (QALY)                      |         | 31,952  | ICER £/ (QALY)                       |          | 11,623   |
| Cost per patient/8 years £          | 13,463  | 13,531  | Cost per patient/17 years £          | 26,186   | 26,240   |
| Incremental Cost £                  |         | 69      | Incremental Cost £                   |          | 53       |
| Effect per patient /8 years (QALYs) | 5.08093 | 5.07843 | Effect per patient /17 years (QALYs) | 9.90620  | 9.90122  |
| Incremental Effect (QALYs)          |         | 0.00251 | Incremental Effect (QALYs)           |          | 0.00498  |
| ICER £/ (QALY)                      |         | 27,374  | ICER £/ (QALY)                       |          | 10,708   |
| Cost per patient/9 years £          | 14,989  | 15,056  | Cost per patient/18 years £          | 27,467   | 27,519   |
| Incremental Cost £                  |         | 67      | Incremental Cost £                   |          | 52       |
| Effect per patient /9 years (QALYs) | 5.66077 | 5.65797 | Effect per patient /18 years (QALYs) | 10.39088 | 10.38566 |
| Incremental Effect (QALYs)          |         | 0.00280 | Incremental Effect (QALYs)           |          | 0.00523  |
| ICER £/ (QALY)                      |         | 23,838  | ICER £/ (QALY)                       |          | 9,897    |
| Cost per patient/10 years £         | 16,487  | 16,552  | Cost per patient/19 years £          | 28,723   | 28,773   |
| Incremental Cost £                  |         | 65      | Incremental Cost £                   |          | 50       |

|                                      |         |         |                                      |          |          |
|--------------------------------------|---------|---------|--------------------------------------|----------|----------|
| Effect per patient /10 years (QALYs) | 6.22917 | 6.22608 | Effect per patient /19 years (QALYs) | 10.86601 | 10.86053 |
| Incremental Effect (QALYs)           |         | 0.00309 | Incremental Effect (QALYs)           |          | 0.00547  |
| ICER £/ (QALY)                       |         | 21,024  | ICER £/ (QALY)                       |          | 9,171    |
| Cost per patient/11 years £          | 17,955  | 18,018  | Cost per patient/20 years £          | 29,954   | 30,003   |
| Incremental Cost £                   |         | 63      | Incremental Cost £                   |          | 49       |
| Effect per patient /11 years (QALYs) | 6.78636 | 6.78298 | Effect per patient /20 years (QALYs) | 11.33176 | 11.32605 |
| Incremental Effect (QALYs)           |         | 0.00338 | Incremental Effect (QALYs)           |          | 0.00571  |
| ICER £/ (QALY)                       |         | 18,732  | ICER £/ (QALY)                       |          | 8,519    |

**Supplementary Table7:** Incremental cost-effectiveness ratios (ICERs) in different time horizon years for Japanese population

ICER: incremental cost-effectiveness ratio, QALY: quality-adjusted life year

|                                     | <b>general treatment<br/>schedule without<br/>HLA test</b> | <b>HLA-guided treatment<br/>schedule</b> |                                      | <b>general treatment<br/>schedule without<br/>HLA test</b> | <b>HLA-guided treatment<br/>schedule</b> |
|-------------------------------------|------------------------------------------------------------|------------------------------------------|--------------------------------------|------------------------------------------------------------|------------------------------------------|
| Cost per patient/3 years £          | 1,478                                                      | 1,567                                    | Cost per patient/12 years £          | 4,881                                                      | 4,945                                    |
| Incremental Cost £                  |                                                            | 89                                       | Incremental Cost £                   |                                                            | 65                                       |
| Effect per patient /3 years (QALYs) | 1.96372                                                    | 1.96477                                  | Effect per patient /12 years (QALYs) | 6.76971                                                    | 6.77351                                  |
| Incremental Effect (QALYs)          |                                                            | 0.00105                                  | Incremental Effect (QALYs)           |                                                            | 0.00379                                  |
| ICER £/ (QALY)                      |                                                            | 84,824                                   | ICER £/ (QALY)                       |                                                            | 17,040                                   |
| Cost per patient/4 years £          | 1,908                                                      | 1,995                                    | Cost per patient/13 years £          | 5,199                                                      | 5,261                                    |
| Incremental Cost £                  |                                                            | 86                                       | Incremental Cost £                   |                                                            | 62                                       |
| Effect per patient /4 years (QALYs) | 2.57424                                                    | 2.57564                                  | Effect per patient /13 years (QALYs) | 7.21747                                                    | 7.22152                                  |
| Incremental Effect (QALYs)          |                                                            | 0.00140                                  | Incremental Effect (QALYs)           |                                                            | 0.00405                                  |
| ICER £/ (QALY)                      |                                                            | 61,515                                   | ICER £/ (QALY)                       |                                                            | 15,397                                   |
| Cost per patient/5 years £          | 2,325                                                      | 2,408                                    | Cost per patient/14 years £          | 5,506                                                      | 5,566                                    |
| Incremental Cost £                  |                                                            | 83                                       | Incremental Cost £                   |                                                            | 60                                       |
| Effect per patient /5 years (QALYs) | 3.16407                                                    | 3.16581                                  | Effect per patient /14 years (QALYs) | 7.65008                                                    | 7.65437                                  |
| Incremental Effect (QALYs)          |                                                            | 0.00174                                  | Incremental Effect (QALYs)           |                                                            | 0.00430                                  |
| ICER £/ (QALY)                      |                                                            | 47,866                                   | ICER £/ (QALY)                       |                                                            | 13,995                                   |
| Cost per patient/6 years £          | 2,728                                                      | 2,808                                    | Cost per patient/15 years £          | 5,803                                                      | 5,861                                    |

|                                     |         |         |                                      |         |         |
|-------------------------------------|---------|---------|--------------------------------------|---------|---------|
| Incremental Cost £                  |         | 80      | Incremental Cost £                   |         | 58      |
| Effect per patient /6 years (QALYs) | 3.73392 | 3.73598 | Effect per patient /15 years (QALYs) | 8.06806 | 8.07259 |
| Incremental Effect (QALYs)          |         | 0.00206 | Incremental Effect (QALYs)           |         | 0.00454 |
| ICER £/ (QALY)                      |         | 38,906  | ICER £/ (QALY)                       |         | 12,786  |
| Cost per patient/7 years £          | 3,117   | 3,195   | Cost per patient/16 years £          | 6,089   | 6,145   |
| Incremental Cost £                  |         | 77      | Incremental Cost £                   |         | 56      |
| Effect per patient /7 years (QALYs) | 4.28445 | 4.28683 | Effect per patient /16 years (QALYs) | 8.47191 | 8.47667 |
| Incremental Effect (QALYs)          |         | 0.00238 | Incremental Effect (QALYs)           |         | 0.00477 |
| ICER £/ (QALY)                      |         | 32,577  | ICER £/ (QALY)                       |         | 11,732  |
| Cost per patient/8 years £          | 3,494   | 3,569   | Cost per patient/17 years £          | 6,366   | 6,420   |
| Incremental Cost £                  |         | 75      | Incremental Cost £                   |         | 54      |
| Effect per patient /8 years (QALYs) | 4.81634 | 4.81902 | Effect per patient /17 years (QALYs) | 8.86210 | 8.86709 |
| Incremental Effect (QALYs)          |         | 0.00268 | Incremental Effect (QALYs)           |         | 0.00499 |
| ICER £/ (QALY)                      |         | 27,870  | ICER £/ (QALY)                       |         | 10,807  |
| Cost per patient/9 years £          | 3,859   | 3,931   | Cost per patient/18 years £          | 6,634   | 6,686   |
| Incremental Cost £                  |         | 72      | Incremental Cost £                   |         | 52      |
| Effect per patient /9 years (QALYs) | 5.33020 | 5.33317 | Effect per patient /18 years (QALYs) | 9.23909 | 9.24430 |
| Incremental Effect (QALYs)          |         | 0.00297 | Incremental Effect (QALYs)           |         | 0.00520 |
| ICER £/ (QALY)                      |         | 24,234  | ICER £/ (QALY)                       |         | 9,988   |
| Cost per patient/10 years £         | 4,211   | 4,281   | Cost per patient/19 years £          | 6,893   | 6,943   |

|                                      |         |         |                                      |         |         |
|--------------------------------------|---------|---------|--------------------------------------|---------|---------|
| Incremental Cost £                   |         | 70      | Incremental Cost £                   |         | 50      |
| Effect per patient /10 years (QALYs) | 5.82665 | 5.82990 | Effect per patient /19 years (QALYs) | 9.60334 | 9.60875 |
| Incremental Effect (QALYs)           |         | 0.00326 | Incremental Effect (QALYs)           |         | 0.00541 |
| ICER £/ (QALY)                       |         | 21,343  | ICER £/ (QALY)                       |         | 9,258   |
| Cost per patient/11 years £          | 4,552   | 4,619   | Cost per patient/20 years £          | 7,143   | 7,191   |
| Incremental Cost £                   |         | 67      | Incremental Cost £                   |         | 48      |
| Effect per patient /11 years (QALYs) | 6.30629 | 6.30982 | Effect per patient /20 years (QALYs) | 9.95527 | 9.96088 |
| Incremental Effect (QALYs)           |         | 0.00353 | Incremental Effect (QALYs)           |         | 0.00561 |
| ICER £/ (QALY)                       |         | 18,990  | ICER £/ (QALY)                       |         | 8,605   |

**Supplementary Table8:** Incremental cost-effectiveness ratios (ICERs) in different time horizon years for the UK population

ICER: incremental cost-effectiveness ratio, QALY: quality-adjusted life year.
