# Supplementary material for: Cost effectiveness of pharmacogenetic-guided clozapine administration based on risk of HLA variants in Japan and the UK
Source: PubMed Central journal article supplement (PMC8260588; doi:10.1038/s41398-021-01487-4), 2021-07-07
Supplement: 41398_2021_1487_MOESM2_ESM.pdf [file 41398_2021_1487_MOESM2_ESM.pdf]

(A)

### Current estimated proportion of CIAG and HLA-B\*59:01

|          | HLA-B*59:01 (+) | HLA-B*59:01 (-) | total   |
|----------|-----------------|-----------------|---------|
| CIAG     | 1,280           | 4,160           | 5,440   |
| CIAG (-) | 2,681           | 91,879          | 94,560  |
| Total    | 3,961           | 96,039          | 100,000 |

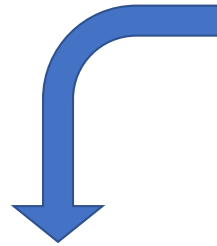

|           | HLA-B*59:01 (+) | HLA-B*59:01 (-) | Sub total |
|-----------|-----------------|-----------------|-----------|
| CIA       | 396 (~30%)      | 692             | 1,088     |
| CIG       | 884 (~70%)      | 3,468           | 4,352     |
| Sub total | 1,280 (100%)    | 4,160           | 5,440     |

set "CIAG prevention rate" = 0.3

$$1,280 \times 0.3 = 384$$

# if we prevent CIG in subjects with HLA-B\*59:01, a maximum ~70% CIAG prevention rate can be obtained.

**Expected proportion by "HLA-guided treatment schedule"**

|           | HLA-B*59:01 (+) | HLA-B*59:01 (-) | Sub total' |
|-----------|-----------------|-----------------|------------|
| CIA       | 396             | 692             | 1088       |
| CIG       | 500             | 3,468           | 3,968      |
| Sub total | 896             | 4,160           | 5,056      |

(~7.0% reduction)

(B)

### Current estimated proportion of CIAG and HLA-B 158T/HLA-DQB1 126Q

|          | HLA-B 158T/HLA-DQB1 126Q(+) | HLA-B 158T/HLA-DQB1 126Q(-) | total   |
|----------|-----------------------------|-----------------------------|---------|
| CIAG     | 1,235                       | 2,195                       | 3,430   |
| CIAG (-) | 10,623                      | 85,947                      | 96,570  |
| Total    | 11,858                      | 88,142                      | 100,000 |

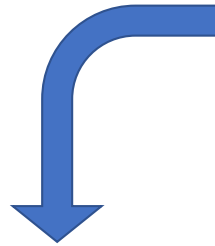

|           | HLA-B 158T/HLA-DQB1 126Q(+) | HLA-B 158T/HLA-DQB1 126Q(-) | Sub total |
|-----------|-----------------------------|-----------------------------|-----------|
| CIA       | 287 (~23%)                  | 413                         | 700       |
| CIG       | 948 (~77%)                  | 1,782                       | 2,730     |
| Sub total | 1,235 (100%)                | 2,195                       | 3,430     |

set "CIAG prevention rate" = 0.3

$$1,235 \times 0.3 = 371$$

# if we prevent CIG in subjects with HLA-B 158T/HLA-DQB1 126Q(-), a maximum ~77% CIAG prevention rate can be obtained.

**Expected proportion by "HLA-guided treatment schedule"**

|           | HLA-B 158T/HLA-DQB1 126Q(+) | HLA-B 158T/HLA-DQB1 126Q(-) | Sub total' |
|-----------|-----------------------------|-----------------------------|------------|
| CIA       | 287                         | 413                         | 700        |
| CIG       | 577                         | 1,782                       | 2,359      |
| Sub total | 658                         | 2,195                       | 3,059      |

(~11% reduction)

**Supplementary Fig. 1** CIAG prevention rate

(A) for Japanese population and (B) for the UK population.

CIAG: clozapine-induced agranulocytosis/granulocytopenia, CIA: clozapine-induced agranulocytosis, CIG: clozapine-induced granulocytopenia.

a maximum ~70% CIAG prevention rate can be obtained using Bayes' theorem:

e.g. Japanese population

$$\begin{aligned} \text{Probability(CIA|HLA - B * 59: 01)} &= \frac{\text{Probability(CIA)} \times \text{Probability(HLA - B * 59: 01|CIA)}}{\text{Probability(HLA - B * 59: 01)}} \\ &= \frac{\text{Prevalence(CIA)} \times \text{"sensitivity for CIA"}}{\text{phenotype frequency of HLA-B*59:01(discussed below)}} = \frac{0.01088 \times 0.364}{0.0396} = 0.10 \end{aligned}$$

$$\begin{aligned} \text{Probability(CIG|HLA - B * 59: 01)} &= \frac{\text{Probability(CIG)} \times \text{Probability(HLA - B * 59: 01|CIA)}}{\text{Probability(HLA - B * 59: 01)}} \\ &= \frac{\text{Prevalence(CIG)} \times \text{"sensitivity for CIG"}}{\text{phenotype frequency of HLA-B*59:01(discussed below)}} = \frac{0.04352 \times 0.293}{0.0396} = 0.223 \end{aligned}$$

thus,

*Estimated proportion of CIG in CIAG for subjects with HLA - B \* 59: 01*

$$= \frac{0.223}{0.10 + 0.223} = 0.69$$

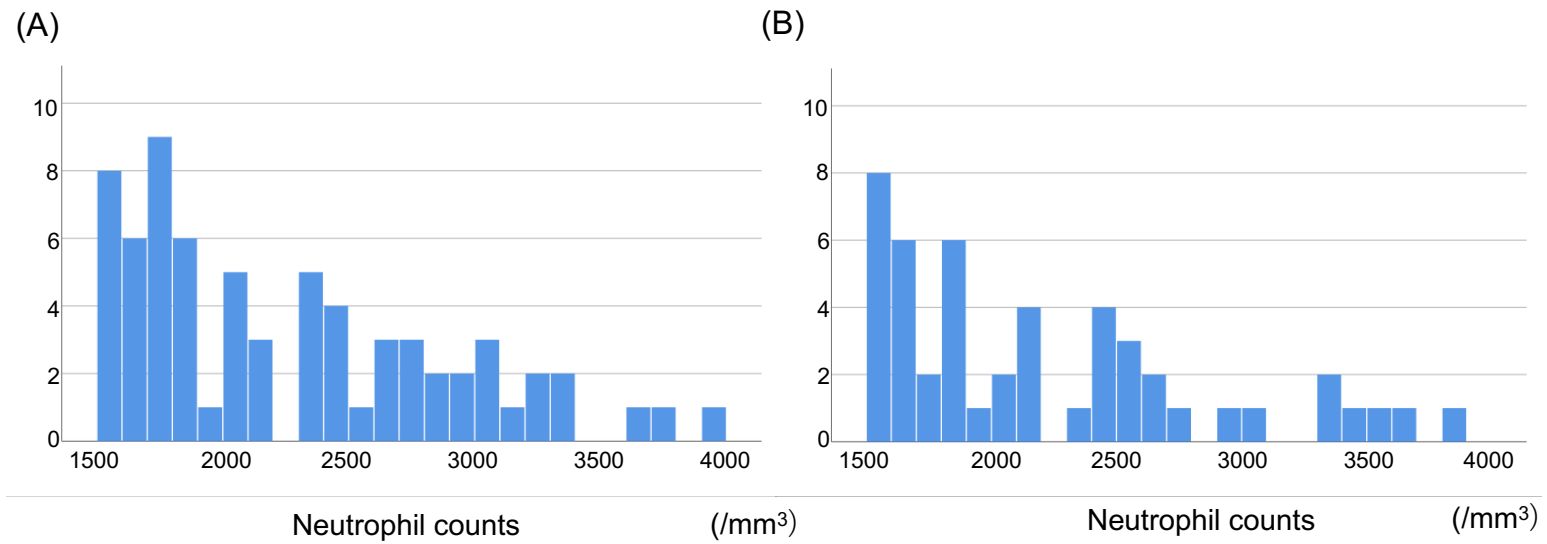

**Supplementary Fig. 2** Absolute neutrophil counts (ANC) of CIAG subjects in Japan

(A) CIA, (B) CIG. X axis indicates bin for minimum neutrophil counts before onset of CIA or CIG (within six months after clozapine initiation) and Y axis indicates number of subjects.

CIAG: clozapine-induced agranulocytosis/granulocytopenia, CLZ: clozapine

HLA-guided treatment schedule

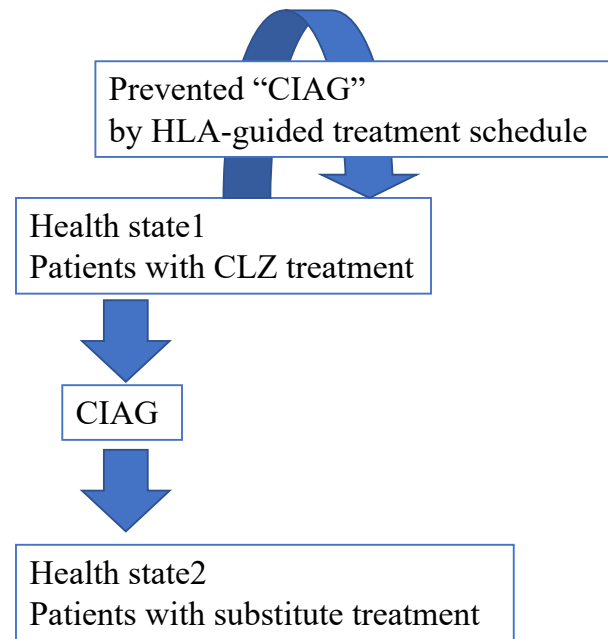

**Supplementary Fig. 3** Markov model schematic

CIAG: clozapine-induced agranulocytosis/granulocytopenia, CLZ: clozapine

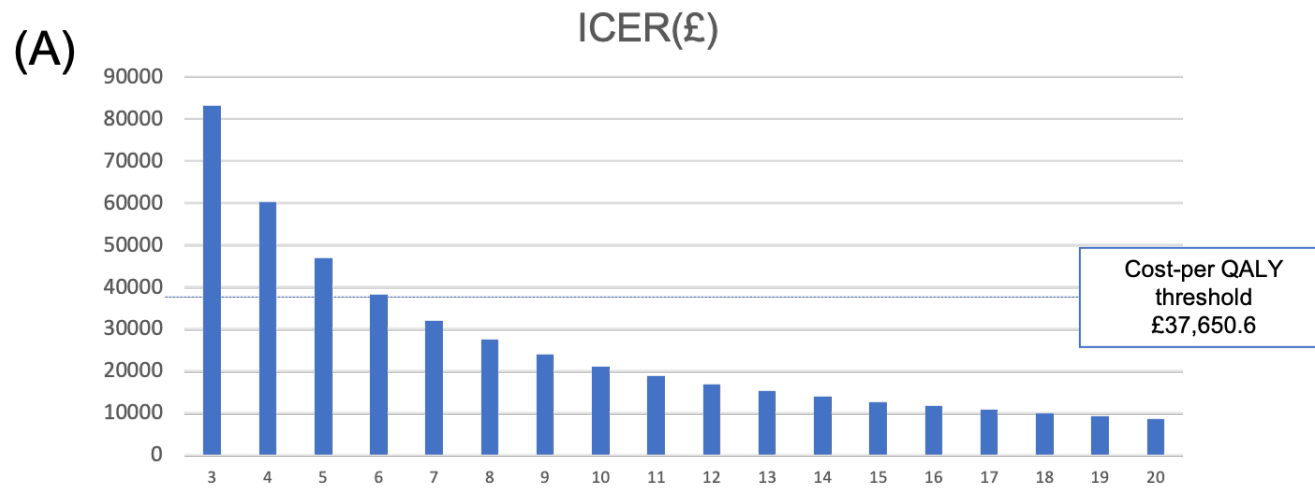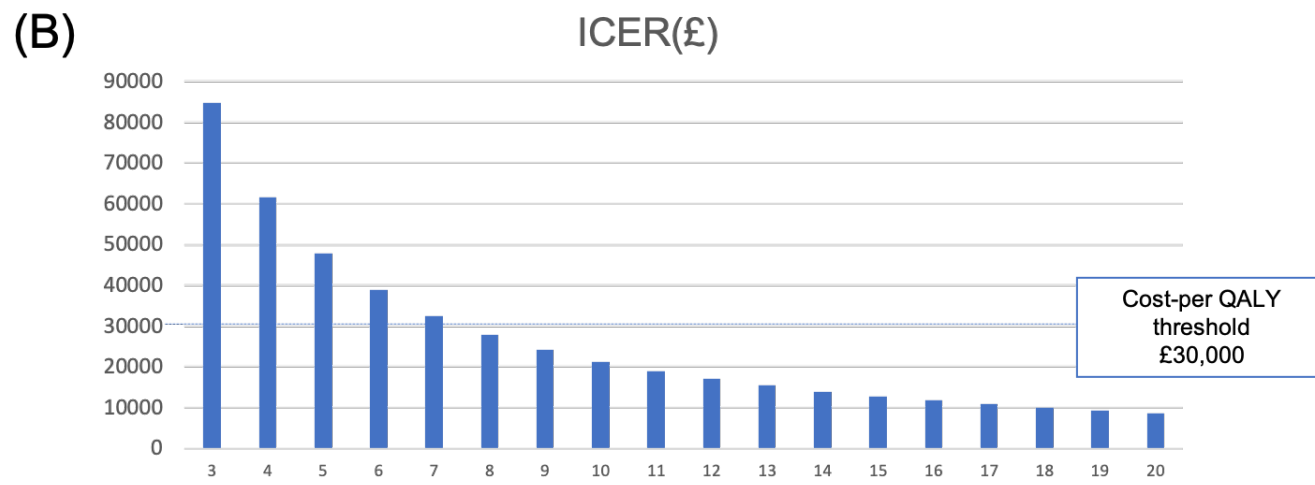

Supplementary Fig. 4 Relationship between the incremental cost-effectiveness ratios (ICERs) and time-horizons
